# Supplementary material
Source: PubMed Central journal article supplement (PMC9420750)
Supplement: NIHMS1789271-supplement-SDC_1.pdf [file NIHMS1789271-supplement-SDC_1.pdf]

Supplemental Table 1. Adjusted Rate Ratios (RR) for Demographic Characteristics and Total Daily Fluid Intake with Urination Frequencies in Healthy Women and Elite Healthy Women, 2008-2010

|                           | Daytime Urination Frequency |                         |                                |                         | Nighttime Urination Frequency |                         |                                |                         |
|---------------------------|-----------------------------|-------------------------|--------------------------------|-------------------------|-------------------------------|-------------------------|--------------------------------|-------------------------|
|                           | Healthy Women<br>(n=1505)   |                         | Elite Healthy Women<br>(n=300) |                         | Healthy Women<br>(n=1505)     |                         | Elite Healthy Women<br>(n=300) |                         |
|                           | 95%<br>reference<br>range   | Adjusted RR<br>(95% CI) | 95%<br>reference<br>range      | Adjusted RR<br>(95% CI) | 95%<br>reference<br>range     | Adjusted RR<br>(95% CI) | 95%<br>reference<br>range      | Adjusted RR<br>(95% CI) |
| Age Group                 |                             |                         |                                |                         |                               |                         |                                |                         |
| 31-44                     | 2-10                        | 1.00 (-,-)              | 2-8                            | 1.00 (-,-)              | 0-4                           | 1.00 (-,-)              | 0-3                            | 1.00 (-,-)              |
| 45-64                     | 2-12                        | 1.13 (1.01,1.27)        | 2-9                            | 1.12 (0.89,1.41)        | 0-4                           | 1.08 (0.67,1.73)        | 0-2                            | 0.86 (0.55,1.34)        |
| 65+                       | 2-9                         | 0.95 (0.85,1.07)        | 2-8                            | 0.82 (0.66,1.03)        | 0-3                           | 1.36 (0.94,1.96)        | 0-2                            | 1.31 (0.44,3.91)        |
| Race                      |                             |                         |                                |                         |                               |                         |                                |                         |
| White                     | 2-10                        | 1.00 (-,-)              | 2-9                            | 1.00 (-,-)              | 0-3                           | 1.00 (-,-)              | 0-2                            | 1.00 (-,-)              |
| Black                     | 2-10                        | 0.92 (0.86,0.99)        | 2-8                            | 0.88 (0.81,0.96)        | 0-4                           | 1.48 (1.29,1.68)        | 0-3                            | 1.27 (0.54,2.99)        |
| Hispanic                  | 2-10                        | 0.92 (0.88,0.97)        | 2-10                           | 0.94 (0.83,1.06)        | 0-4                           | 1.59 (0.70,3.63)        | 0-3                            | 1.12 (0.57,2.20)        |
| Fluid Intake              |                             |                         |                                |                         |                               |                         |                                |                         |
| ≤ 49 oz                   | 2-10                        | 0.89 (0.84,0.96)        | 2-7                            | 0.71 (0.62,0.81)        | 0-4                           | 0.81 (0.57,1.17)        | 0-2                            | 0.67 (0.37,1.21)        |
| 50-74 oz                  | 2-9                         | 1.00 (-,-)              | 2-9                            | 1.00 (-,-)              | 0-4                           | 1.00 (-,-)              | 0-3                            | 1.00 (-,-)              |
| 75+ oz                    | 2-12                        | 1.04 (0.98,1.10)        | 3-10                           | 0.94 (0.85,1.05)        | 0-4                           | 0.99 (0.77,1.27)        | 0-2                            | 0.94 (0.56,1.56)        |
| Time of most fluid intake |                             |                         |                                |                         |                               |                         |                                |                         |
| Before 5 PM               |                             |                         |                                |                         |                               | 1.00 (-,-)              |                                | 1.00 (-,-)              |
| After 5 PM                |                             |                         |                                |                         |                               | 1.06 (0.85,1.33)        |                                | 0.57 (0.31,1.02)        |

Note: Adjusted for age group, race/ethnicity, body mass index, smoking status, hormonal status, sleep problems, depression/anxiety, cardiovascular disease, hypertension, diabetes, joint-related problems, and daily fluid intake (for age and race/ethnicity only); CI= confidence interval. RR=rate ratio.
