# Supplementary material
Source: PubMed Central journal article supplement (PMC9420750)
Supplement: NIHMS1789271-supplement-SDC_2.pdf [file NIHMS1789271-supplement-SDC_2.pdf]

Supplemental Table 2. 95% Reference Ranges and Adjusted Rate Ratios of Daytime and Nighttime Urination Frequencies Type of Fluid Intake in Healthy Women and Elite Healthy Women in the Boston Area Community Health Survey, 2008-2010

|                           | Daytime Urinations        |                         |                                |                         | Nighttime Urinations      |                         |                                |                         |
|---------------------------|---------------------------|-------------------------|--------------------------------|-------------------------|---------------------------|-------------------------|--------------------------------|-------------------------|
|                           | Healthy Women<br>(n=1505) |                         | Elite Healthy Women<br>(n=300) |                         | Healthy Women<br>(n=1505) |                         | Elite Healthy Women<br>(N=300) |                         |
|                           | 95%<br>Reference<br>Range | Adjusted RR<br>(95% CI) | 95%<br>Reference<br>Range      | Adjusted RR<br>(95% CI) | 95%<br>Reference<br>Range | Adjusted RR<br>(95% CI) | 95%<br>Reference<br>Range      | Adjusted RR<br>(95% CI) |
| <b>Carbonated drinks</b>  |                           |                         |                                |                         |                           |                         |                                |                         |
| 0-7 oz                    | 2-10                      | 1.00 (-,-)              | 2-9                            | 1.00 (-,-)              | 0-4                       | 1.00 (-,-)              | 0-2                            | 1.00 (-,-)              |
| 8-15 oz                   | 2-9                       | 0.98 (0.93,1.02)        | 3-8                            | 0.92 (0.87,0.97)        | 0-3                       | 1.12 (0.98,1.28)        | 0-2                            | 1.66 (1.24,2.24)        |
| 16+ oz                    | 2-10                      | 0.98 (0.92,1.04)        | 2-8                            | 0.83 (0.78,0.88)        | 0-4                       | 1.34 (1.14,1.57)        | 0-2                            | 1.43 (1.00,2.03)        |
| <b>Caffeinated drinks</b> |                           |                         |                                |                         |                           |                         |                                |                         |
| 0 oz                      | 2-10                      | 1.00 (-,-)              | 2-9                            | 1.00 (-,-)              | 0-4                       | 1.00 (-,-)              | 0-3                            | 1.00 (-,-)              |
| 1-16 oz                   | 2-10                      | 1.01 (0.92,1.10)        | 2-9                            | 1.12 (0.90,1.40)        | 0-4                       | 0.88 (0.62,1.27)        | 0-2                            | 0.83 (0.39,1.77)        |
| 17-60 oz                  | 2-10                      | 1.05 (0.97,1.14)        | 2-8                            | 1.12 (0.97,1.30)        | 0-4                       | 1.01 (0.81,1.26)        | 0-2                            | 0.78 (0.40,1.55)        |
| 61+ oz                    | 2-11                      | 0.97 (0.89,1.07)        | 4-8                            | 1.02 (0.89,1.16)        | 0-6                       | 1.39 (0.71,2.73)        | 0-4                            | 1.35 (0.61,2.98)        |
| <b>Alcohol drinks</b>     |                           |                         |                                |                         |                           |                         |                                |                         |
| 0 oz                      | 2-10                      | 1.00 (-,-)              | 2-8                            | 1.00 (-,-)              | 0-4                       | 1.00 (-,-)              | 0-3                            | 1.00 (-,-)              |
| 1-24 oz                   | 2-10                      | 1.12 (1.06,1.19)        | 2-9                            | 1.21 (1.06,1.40)        | 0-3                       | 0.86 (0.61,1.23)        | 0-2                            | 0.75 (0.52,1.07)        |
| 25+ oz                    | 3-10                      | 1.09 (0.99,1.16)        | 3-6                            | 0.97 (0.88,1.07)        | 0-3                       | 0.94 (0.68,1.30)        | 0-1                            | 0.77 (0.46,1.28)        |

Note: Adjusted for age group, race/ethnicity, body mass index, smoking status, hormonal status, sleep problems, depression/anxiety, cardiovascular disease, hypertension, diabetes, joint-related problems, and total fluid intake. CI=confidence interval. RR=rate ratio.
